# Supplementary material
Source: publisher site journal article supplement (https://www.dovepress.com/article/434776)
Supplement: Supplementary file 1 [file get_supplementary_file.php]

## Supplementary files

### Supplementary file 1

#### COVID-19 Questionnaire/Survey to National Societies in Latin America

1. Pandemic numbers per country (state the date of the response), and status of the curve
  - A. Capacity in ICU:
  - B. PPE supply:
  - C. Lockdown in place, until when?
  - D. Universal masking required?
2. Dramatic declines in the number of visits, can you tell as what percentage has your number of visits declined per country?
3. in Clinical practice, do you use the following?
  - A. What precautions are taken in clinic?
  - B. PPE for doctors, staff and patients
  - C. N95 for doctors?
  - D. Maximize social distancing
  - E. Minimize time in the office
  - F. Only essential testing
  - G. Virtual waiting rooms
  - H. Virtual scribes
  - I. COVID tests?
4. Do you use Telemedicine? Elaborate if you do.
5. Surgery, let us know:
  - A. Percentage of drop in overall surgical volume?
  - B. Are you doing Only emergent, essential cases?
  - C. Have you Operating rooms and post-operative recovery areas converted to ICUs?
  - D. Has your Operating staff moved to ICUs?
  - E. COVID screening pre-op? COVID Tests preop?
  - F. General anesthesia is performed?
  - G. What precautions are taken in the OR?
  - H. N95 for doctors?
6. Have you seen urgent surgical cases delayed more than ideal due to the Pandemic and have you seen consequences of it?
  - A. What percentage of emergent/urgent cases has decreased compared to before COVID, if any?
7. Minor procedures (including injections if applicable)
  - A. Do you perform Minimal imaging?
  - B. Short visits minimizing patient contact with staff?
  - C. Extended intervals with telemedicine contacts?
  - D. Have you Considered longer acting medications?
8. Do you have any plans for reopening "normal" activities? Elaborate.
9. Considerations Post-COVID, do you agree with (please elaborate):
  - A. Retinal and ophthalmology practices will never be the same
  - B. Post pandemic retinal practice will be a continuing exercise in social distancing and PPE for the foreseeable future

- C. The days of packed waiting rooms and extended waits for imaging or examination are over
- D. New approaches such as virtual waiting rooms, virtual scribes, telemedicine and home-based testing will redefine our practices

10. Could you please comment on the main differences on the above points between governmental hospitals and private practice?

11. Additional comments:
